# Supplementary material for: Production of oceanic nitrous oxide by ammonia-oxidizing archaea
Source: Copernicus journal article supplement (doi:10.5194/bg-9-2419-2012), 2012-07-04
Supplement: Supplementary file 1 [file bg-9-2419-2012-supplement.pdf]

**Tab S1: Abundance of clusters A and B in clone libraries generated from samples from the ETNA and ETSP**

| Area                    | N <sub>2</sub> O | O <sub>2</sub> | No. of sequenced clones | % Cluster A sequences | % Cluster B sequences |
|-------------------------|------------------|----------------|-------------------------|-----------------------|-----------------------|
| ETSP OMZ                | > 25nmol/L       | < 60μmol/L     | 96                      | 11.5                  | 88.5                  |
| ETNA surrounding waters | < 25nmol/L       | > 60μmol/L     | 91                      | 48.4                  | 50.6                  |
| ETSP OMZ                | *                | < 30μmol/L     | 70                      | 8.6                   | 91.4                  |
| ETSP surrounding waters | *                | > 30μmol/L     | 66                      | 56.1                  | 43.9                  |

\* Due to the lack of correlation between N<sub>2</sub>O and O<sub>2</sub>, no ranges for N<sub>2</sub>O are given in this table.

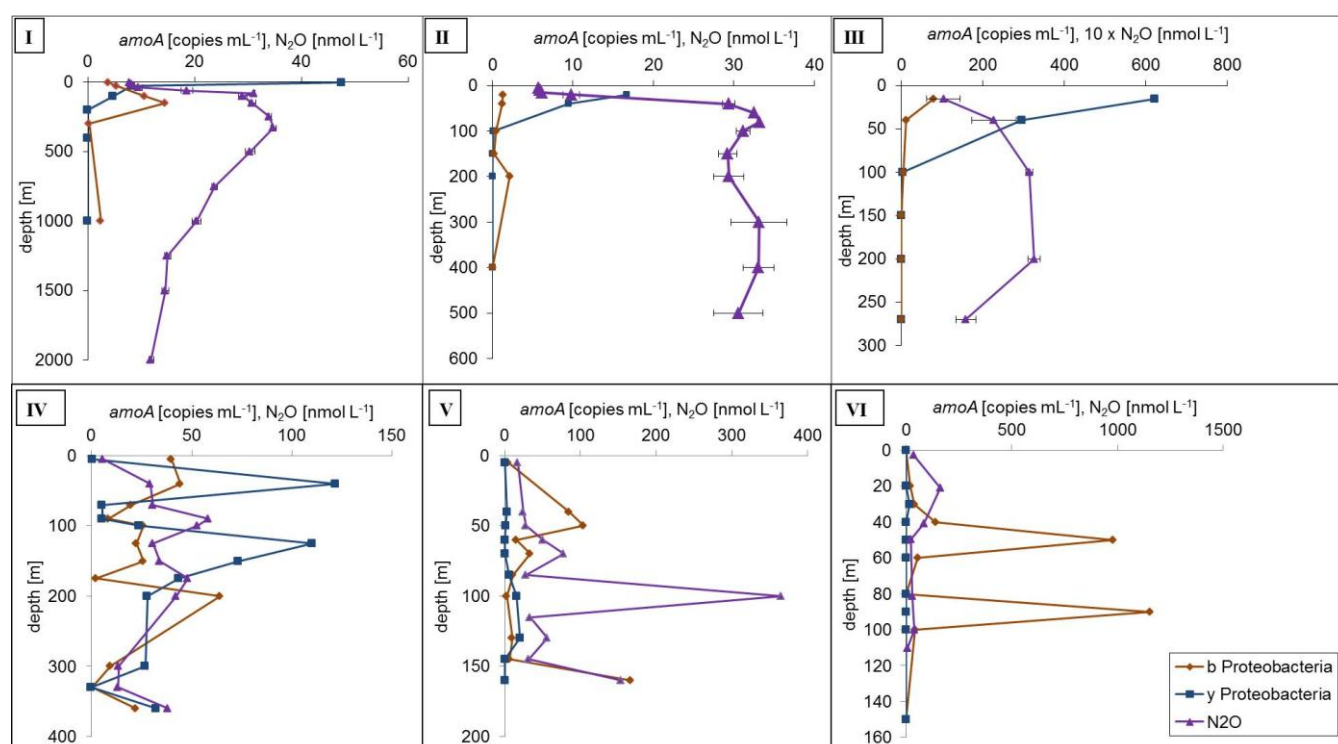

**Fig. S1:** Distribution of  $\beta$ - and  $\gamma$ - Proteobacterial *amoA* gene abundance along vertical profiles of N<sub>2</sub>O from the eastern tropical North Atlantic Ocean (upper 3 panels) and from the eastern tropical South Pacific Ocean (lower 3 panels). The locations of sampling stations are indicated with asterisks in the map, Fig.1. Selected vertical profiles (I-VI) are shown; (I) and (IV) are located offshore, (II) and (V) are located on the continental slope, and (III) and (VI) are onshore/coastal stations.
